# Supplementary material
Source: PubMed Central journal article supplement (PMC5815931)
Supplement: NIHMS928008-supplement-3.pdf [file NIHMS928008-supplement-3.pdf]

**Supplementary Table 1: Patients with unknown primary lesions and without immunosuppression have improved survival among patients with stage IIIB and stage IV MCC**

| <b>Stage IIIB (n = 92)</b> | <b><u>Univariate analysis</u></b> |                |          | <b><u>Multivariate analysis</u></b> |                |          |
|----------------------------|-----------------------------------|----------------|----------|-------------------------------------|----------------|----------|
|                            | <b>HR</b>                         | <b>95% CI</b>  | <b>P</b> | <b>HR</b>                           | <b>95% CI</b>  | <b>P</b> |
| MCC-specific survival      | 0.411                             | 0.191 to 0.888 | 0.024    | 0.362                               | 0.154 to 0.849 | 0.021    |
| Overall survival           | 0.400                             | 0.190 to 0.841 | 0.016    | 0.407                               | 0.179 to 0.926 | 0.032    |
| Recurrence-free survival   | 0.436                             | 0.230 to 0.826 | 0.011    | 0.422                               | 0.205 to 0.865 | 0.018    |
| <b>Stage IV (n = 19)</b>   |                                   |                |          |                                     |                |          |
| MCC-specific survival      | 0.278                             | 0.084 to 0.922 | 0.036    | 0.230                               | 0.046 to 1.137 | 0.071    |
| Overall survival           | 0.278                             | 0.084 to 0.922 | 0.036    | 0.198                               | 0.035 to 1.136 | 0.069    |
| Recurrence-free survival   | 0.685                             | 0.027 to 1.772 | 0.436    | 0.801                               | 0.229 to 2.802 | 0.728    |
