# Supplementary material
Source: PubMed Central journal article supplement (PMC5815931)
Supplement: NIHMS928008-supplement-4.pdf [file NIHMS928008-supplement-4.pdf]

| <b>Supplementary Table 2: Summary of patients receiving immunotherapies</b> |                         |                         |
|-----------------------------------------------------------------------------|-------------------------|-------------------------|
| <b>Non-checkpoint inhibitor immunotherapies</b>                             | <b># of UP patients</b> | <b># of KP patients</b> |
| Anti-CD137 (4-1BB)                                                          | 2                       | 3                       |
| TLR4 agonist (GLA)                                                          | 0                       | 2                       |
| IFNbeta injection                                                           | 0                       | 1                       |
| IL-12 DNA electroporation                                                   | 2                       | 0                       |
| Anti-CD56                                                                   | 2                       | 0                       |
| Autologous T cell therapy                                                   | 1                       | 0                       |
| IL-2                                                                        | 1                       | 0                       |
| <b>Checkpoint inhibitor immunotherapies</b>                                 | <b># of UP patients</b> | <b># of KP patients</b> |
| Anti-PD-L1 (avelumab)                                                       | 0                       | 2                       |
| Anti-CTLA4 and anti-PD-1 (ipilimumab and nivolumab)                         | 0                       | 1                       |
| Anti-PD-1 (nivolumab/pembrolizumab)                                         | 0                       | 3                       |
| <b>Other therapy (excluding radiation, surgery, chemo)</b>                  | <b># of UP patients</b> | <b># of KP patients</b> |
| Tyrosine kinase inhibitor (votrient)                                        | 1                       | 1                       |
| Somatostatin analog (sandostatin)                                           | 4                       | 0                       |
| topoisomerase inhibitors (Topotecan and irinotecan)                         | 3                       | 0                       |
